# Supplementary material
Source: PubMed Central journal article supplement (PMC6554053)
Supplement: NIHMS1521847-supplement-2.pdf [file NIHMS1521847-supplement-2.pdf]

## **Supplementary Information**

### **Title:**

**FDA-approved ferumoxytol displays anti-leukaemia efficacy against cells with low ferroportin levels**

### **Authors:**

Vicenta Trujillo-Alonso<sup>†</sup>, Edwin C. Pratt<sup>†</sup>, Hongliang Zong, Andres Lara-Martinez, Charalambos Kaittanis, Mohamed O. Rabie, Valerie Longo, Michael W. Becker, Gail J. Roboz, Jan Grimm, Monica L. Guzman

<sup>†</sup> *Equal contribution*

Correspondence should be addressed to M.G. at [mlg2007@med.cornell.edu](mailto:mlg2007@med.cornell.edu) and J.G. at [grimmj@mskcc.org](mailto:grimmj@mskcc.org)

**Supplementary Table 1.** List of leukaemia cell lines used for in vitro studies in Figure 1A, 1B, 1E, and Figure 2. Details on morphology, type of leukaemia, mutations for each cell line and SLC40A1 expression by RTqPCR using the  $2^{-\Delta\Delta C_t}$  method and % positive cells by flow cytometry. ND = not determined.

| Cell Line        | Morphology          | Type                      | Karyotype and/or mutation (s)             | SLC40A1 $2^{-\Delta\Delta C_t}/nCD34$ | % Ferroportin |
|------------------|---------------------|---------------------------|-------------------------------------------|---------------------------------------|---------------|
| HL60             | promyelocytic       | AML                       | c-myc+, TP53, CDK2NA/B, NRAS              | 0.0157                                | 2.2           |
| KG-1             | myeloblastic        | AML                       | OP2-FGFR1                                 | 0.5497                                | 2.9           |
| KCL22            |                     | CML in blast crisis       | BCR-ABL                                   | ND                                    | 4.1           |
| UKE-1            | megakaryoblastic    | Essential Thrombocythemia | JAK2V617F                                 | 0.0842                                | 4.3           |
| MV411            | monocytic           | AML, M5                   | FLT3-ITD, MLL-AF4                         | 0.0035                                | 5.3           |
| REH              | Lymphoblastic       | ALL (non-B, non T)        |                                           | 0.0187                                | 8.2           |
| ME-1             | myeloblastic        | AML, M4                   | INV 16 (p13;q22)                          | 0.0036                                | 8.3           |
| KASUMI-1         | myelomonocytic      | AML, M2                   | AML1-ETO, N822K c-kit, TP53, CDK2NA/B     | 0.1421                                | 8.6           |
| U-937            | monocytic           | AML, M5                   | CALM-AF910                                | 0.0408                                | 11.1          |
| THP-1            | monocytic           | AML, M5                   | MLL-AF9                                   | 0.0471                                | 11.8          |
| OCI-AML2         | myeloblastic        | AML, M4                   | NPM1 wt, DNMT3A R635W mutant              | 0.1726                                | 13.5          |
| SET-2            | megakaryoblastic    | Essential Thrombocythemia | JAK2V617F                                 | 3.8015                                | 17.9          |
| MOLM13           | monocytic           | AML, M5                   | FLT3-ITD, MLL-AF9, CDKN2A del, CDKN2B del | 0.0001                                | 22.3          |
| K562             |                     | CML                       | BCR-ABL, CDKN2A del, CDKN2B del           | 0.1594                                | 31.5          |
| HEL              | erythroleukemia     | AML, M6                   | JAK2V617F, CDKN2A del, CDKN2B del         | 2.4425                                | 44.9          |
| TF-1             | erythroleukemia     | AML                       |                                           | 1.8999                                | 62.3          |
| TUR              | monocytic           | AML, M5                   | TPA-U937 Resistant                        | 0.0380                                | ND            |
| SKM-1            | monocytic           | AML, M5                   | p53 anti-oncogene                         | 0.0987                                | ND            |
| OCI-AML3         | myeloblastic        | AML, M4                   | human hyperdiploid karyotype. NPM1 mutant | 0.0978                                | ND            |
| SKNO-1           | myeloblastic        | AML, M2                   | AML1-ETO, N822K c-kit                     | 0.3001                                | ND            |
| Murine Leukaemia | CML in blast crisis | ND                        | BCR/ABL-Nup98/HoxA9 translocation         | 0.03                                  | ND            |

**Supplementary Table 2.** Primary AML samples used in Figure 3 with available de-identified information. SLC40A1 expression by RTqPCR using the  $2^{-\Delta\Delta C_t}$  method and % positive cells by flow cytometry ND = not determined.

| ID    | Sample information                                | SLC40A1 $2^{-\Delta\Delta C_t}/nCD34$ |        | % Ferroportin |       |            |
|-------|---------------------------------------------------|---------------------------------------|--------|---------------|-------|------------|
|       |                                                   | Blasts                                | CD34+  | Blasts        | CD34+ | CD34+CD38- |
| AML 1 | ND                                                | 0.3                                   | ND     | ND            | ND    | ND         |
| AML2  | M4; Normal cytogenetics; Relapsed                 | 1.1                                   | ND     | 6.5           | 4.4   | 3.4        |
| AML3  | ND                                                | 0.3                                   | ND     | 43.3          | 26.6  | 34.3       |
| AML4  | De Novo; M2; Normal cytogenetics                  | 2.1                                   | ND     | 41.1          | 46.1  | 43.7       |
| AML5  | MDS progression to AML                            | 1.2                                   | ND     | 30.1          | 11.6  | 9.5        |
| AML8  | ND                                                | 3.0                                   | ND     | 8.2           | 4.6   | 3.8        |
| AML9  | ND                                                | ND                                    | 0.065  | ND            | ND    | ND         |
| AML10 | del(9)(q13)[1]; De Novo                           | 0.3                                   | 0.5708 | ND            | ND    | ND         |
| AML12 | De Novo; Normal cytogenetics                      | 0.3                                   | ND     | ND            | ND    | ND         |
| AML14 | MDS progression to AML                            | 0.0                                   | ND     | 57.1          | 57.2  | 59.3       |
| AML15 | Refractory; 4, XY, +8[3]                          | 0.1                                   | ND     | ND            | ND    | ND         |
| AML18 | Normal cytogenetics; FLT3-ITD+, mut/NPM1; De Novo | 0.2                                   | 0.1488 | ND            | ND    | ND         |
| AML20 | FLT3-ITD+                                         | 1.7                                   | 0.0078 | ND            | ND    | ND         |
| AML32 | ND                                                | ND                                    | 0.1868 | ND            | ND    | ND         |
| AML33 | ND                                                | ND                                    | 0.2622 | ND            | ND    | ND         |
| AML34 | NPM1 type A                                       | ND                                    | 0.3550 | 60.9          | ND    | ND         |
| AML37 | Relapsed                                          | 0.3                                   | 1.7360 | ND            | ND    | ND         |
| AML52 | ND                                                | 0.8                                   | ND     | ND            | ND    | ND         |
| AML54 | ND                                                | 0.5                                   | 1.1080 | 44.1          | 18.6  | 6.5        |
| AML55 | ND                                                | 0.2                                   | ND     | 73            | ND    | ND         |
| AML61 | ND                                                | 1.0                                   | 2.2389 | 10.1          | 9.8   | 6.8        |
| AML72 | NPM1 type A                                       | 0.1                                   | ND     | 40.8          | ND    | ND         |
| AML73 | ND                                                | 1.6                                   | ND     | ND            | ND    | ND         |
| AML74 | NPM1 type A                                       | 0.5                                   | ND     | ND            | ND    | ND         |
| AML75 | NPM1 type A                                       | 0.8                                   | ND     | 36.4          | 0.97  | ND         |
| AML76 | ND                                                | 0.8                                   | ND     | 39.9          | 25.7  | 15.2       |
| AML79 | ND                                                | 0.1                                   | ND     | 15.6          | 8.4   | 4.7        |
| AML80 | ND                                                | ND                                    | ND     | 48.3          | 12    | 29.0       |
| AML81 | ND                                                | ND                                    | ND     | 66.5          | 3.0   | 44.4       |
| AML82 | ND                                                | ND                                    | ND     | 9.9           | 0.0   | 0.0        |
| AML83 | ND                                                | ND                                    | ND     | 5.9           | 0.0   | 0.0        |
| AML90 | ND                                                | ND                                    | ND     | 4.8           | 1.5   | 1.8        |
| AML91 | FLT3 wt, NPM1 wt                                  | ND                                    | ND     | 14.6          | 0.0   | ND         |
| AML92 | ND                                                | ND                                    | ND     | 42.5          | 7.9   | 0.0        |
| AML93 | ND                                                | ND                                    | ND     | 54.1          | 11.3  | 22.0       |

**Supplementary Table 3.** Reagent list of antibodies and dyes used for flow cytometry.

| Surface Marker/Viability dye                             | Fluorochrome | Clone  | Catalog number | Lot number         | Dilution | Company                  |
|----------------------------------------------------------|--------------|--------|----------------|--------------------|----------|--------------------------|
| Murine CD45                                              | PECy5        | 30F11  | 103110         | B219251            | 0.001    | BioLegend                |
| Human CD45                                               | APC-Cy7      | 2D1    | 368516         | B224328            | 0.01     | BioLegend                |
| Human CD45                                               | APCH7        | 2D1    | 560178         | 6118754            | 0.01     | BD Pharmigen             |
| Human CD34                                               | PECy7        | 581    | 560710         | 7054753            | 0.01     | BD Pharmigen             |
| Human CD38                                               | APC          | HIT2   | 555462         | 55114              | 0.01     | BD Pharmigen             |
| Human Ferroportin                                        | AF405        | 8G10NB | NBP2-45356     | A-3-101717         | 0.02     | Novus Biologicals        |
| Isotype IgG2b                                            | AF405        | MCP-11 | NBP2-27231     | AB100711A-6-042518 | 0.02     | Novus Biologicals        |
| 4',6-Diamidino-2-Phenylindole,<br>Dihydrochloride (DAPI) |              |        | D1306          |                    | 1 ug/ml  | Thermo Fisher Scientific |
| 7-Aminoactinomycin D (7AAD)                              |              |        | A1310          |                    | 1 ug/ml  | Thermo Fisher Scientific |

**Supplementary Table 4.** Reagent list of Taqman probes used for quantitative RT-PCR.

| Gene Name                                            | Catalog Number |
|------------------------------------------------------|----------------|
| <b>IRON</b>                                          |                |
| SLC40A1                                              | Hs00205888_m1  |
| SLC40A1 (Murine)                                     | Mm01254822_m1  |
| HAMP                                                 | Hs00221783_m1  |
| TFRC                                                 | Hs00951083_m1  |
| FTH1                                                 | Hs01000477_g1  |
| FTL                                                  | Hs00830226_gH  |
| IREB2                                                | Hs00386293_m1  |
| <b>Antioxidant</b>                                   |                |
| NFE2L2                                               | Hs00975961_g1  |
| HMOX1                                                | Hs01110250_m1  |
| GCLC                                                 | Hs00155249_m1  |
| GCLM                                                 | Hs00157694_m1  |
| SQSTM1                                               | Hs00177654_m1  |
| NQO1                                                 | Hs02512143_s1  |
| GSR                                                  | Hs00167317_m1  |
| GSS                                                  | Hs00609286_m1  |
| GPX4                                                 | Hs00989766_g1  |
| SLC7A11                                              | Hs00921938_m1  |
| <b>Inflammation</b>                                  |                |
| IL1a                                                 | Hs00174092_m1  |
| IL1b                                                 | Hs01555410_g1  |
| IL6                                                  | Hs00174131_m1  |
| TNF $\alpha$ (length = 80)                           | Hs00174128_m1  |
| TNF $\alpha$ (length = 143)                          | Hs01113624_g1  |
| <b>Housekeeping</b>                                  |                |
| ABL1                                                 | Hs01104728_m1  |
| B2M (murine)                                         | Mm00437762_m1  |
| <b>Common Reagents</b>                               |                |
| SuperScript™ IV Reverse Transcriptase                | 11756050       |
| SuperScript™ VILO™ cDNA Synthesis Kit                | 11754050       |
| RNase Inhibitor 40U/ $\mu$ l Ambion                  | AM2682         |
| Oligo dt (20) Thermo Fisher Scientific               | 18418          |
| Taqman gene expression master mix Applied Biosystems | 4369016        |

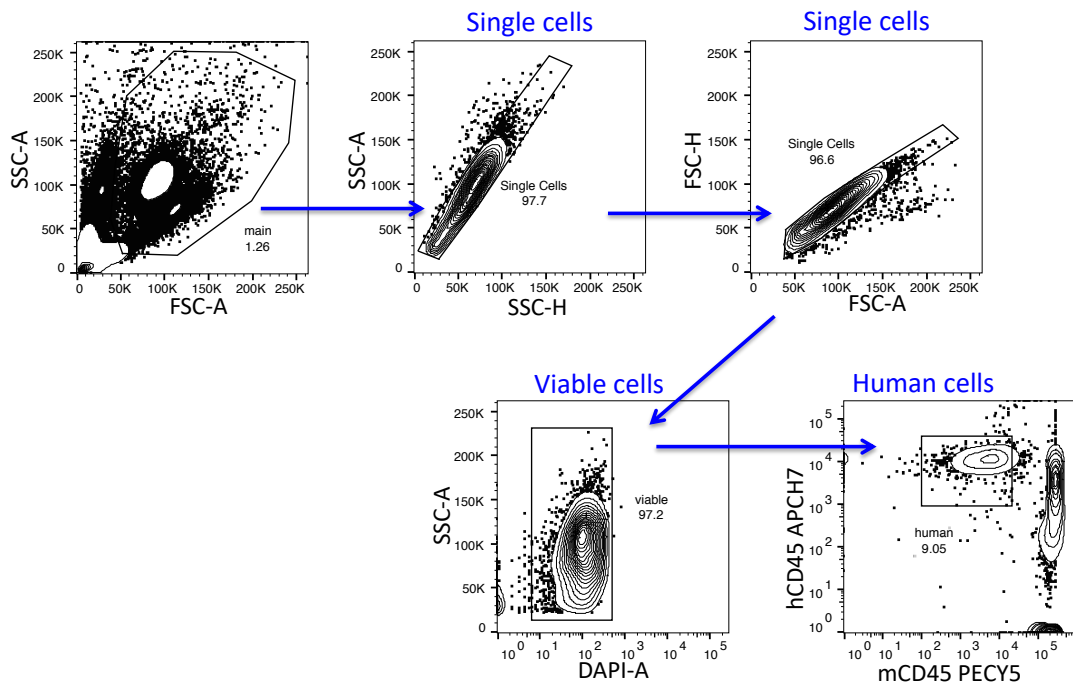

**Supplementary Figure 1.** Gating strategy for flow cytometry of human cells in patient derived xenografts.

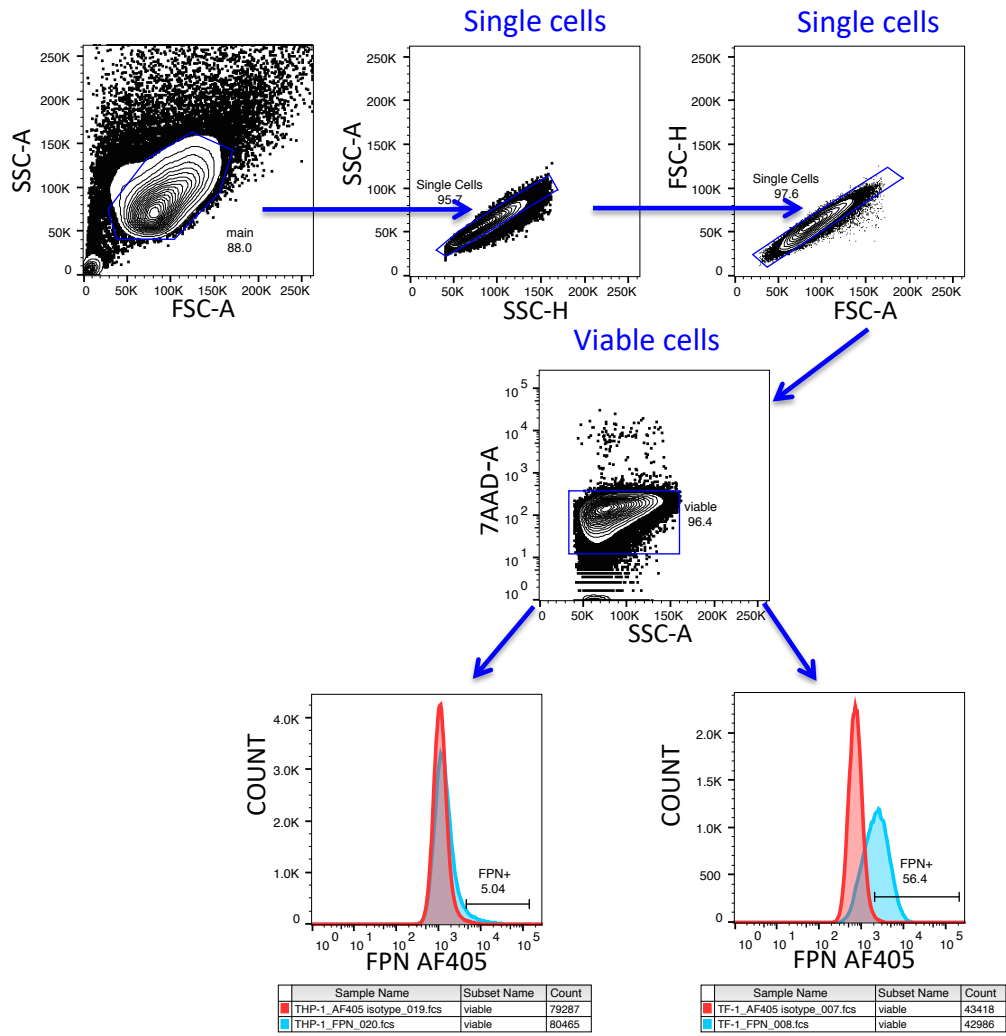

**Supplementary Figure 2.** Gating strategy for determination of ferroportin (FPN) in leukaemia cell lines.

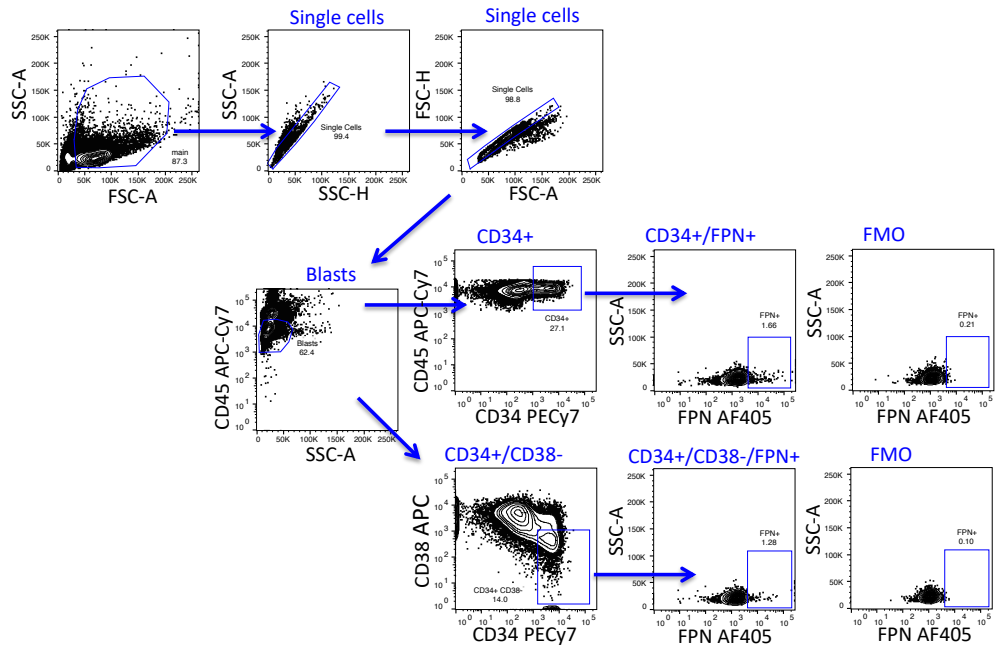

**Supplementary Figure 3.** Gating strategy for flow cytometry of ferroportin (FPN) expression in human primary AML samples.



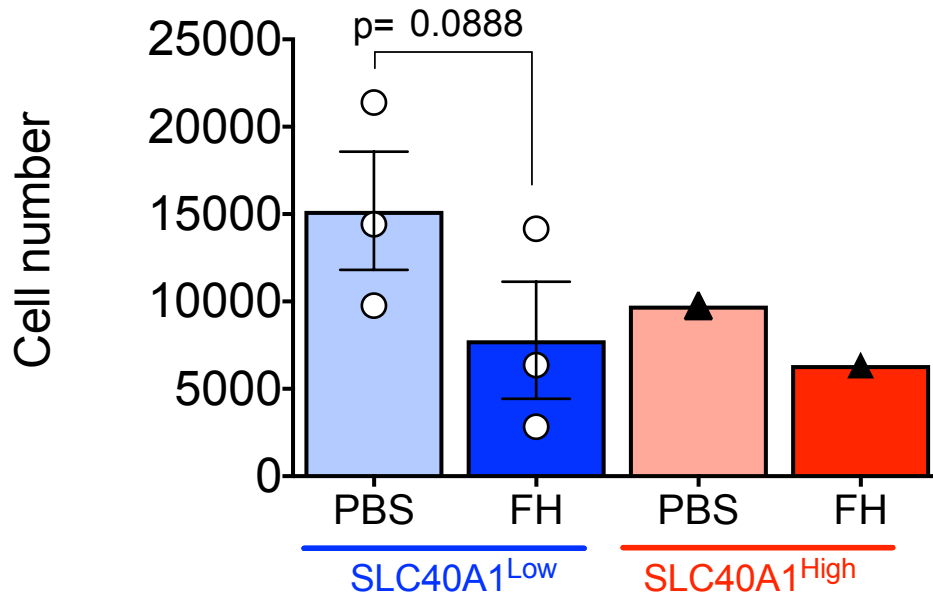

**Supplementary Figure 4.** Primary leukaemia sample cell survival represented by cell counts at 24h after exposure to ferumoxytol (FH) or PBS. Limited availability of primary AML high line limits biological replicates, n=3 AML patient FPN low samples/lines, n=1 patient FPN high sample. One-sided paired t-test was used for FPN Low AML lines, centre value = mean, error bars = SEM.

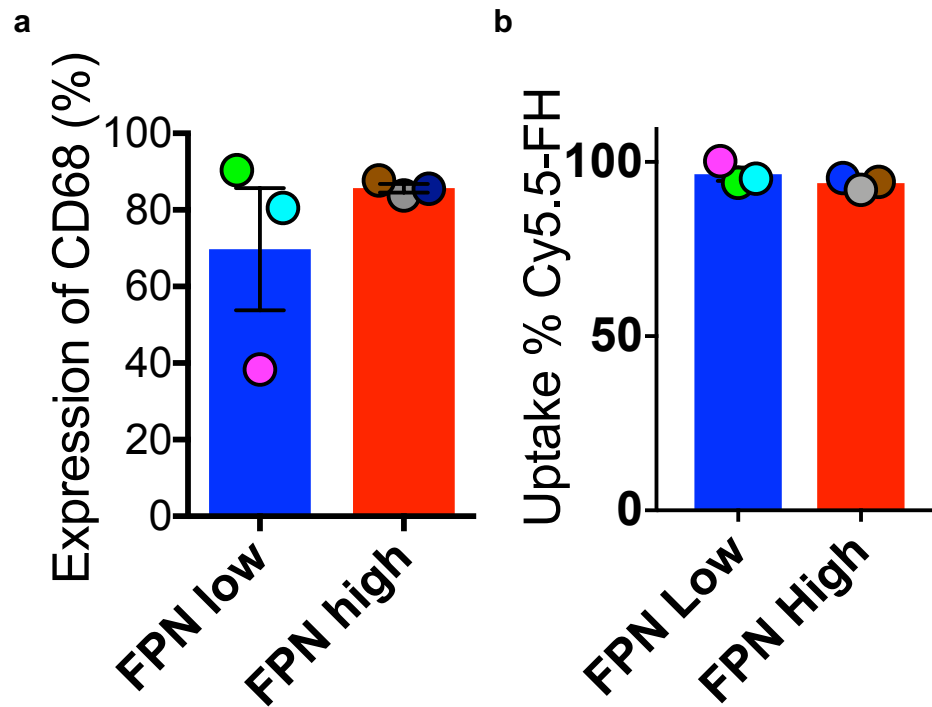

**Supplementary Figure 5.** CD68 expression as a marker of phagocytosis is unchanged between FPN high and low expressing lines. Similarly, Cy5.5 labelled ferumoxytol was found to be taken up across all cell lines tested. Green = KCL22, magenta = MV411, teal = UKE1, brown = SET2, grey = TF-1, navy blue = HEL. N=3 cell lines per FPN high or low group, n=2 measurements per cell line, centre value = mean, error bars = SEM.

## Iron Genes

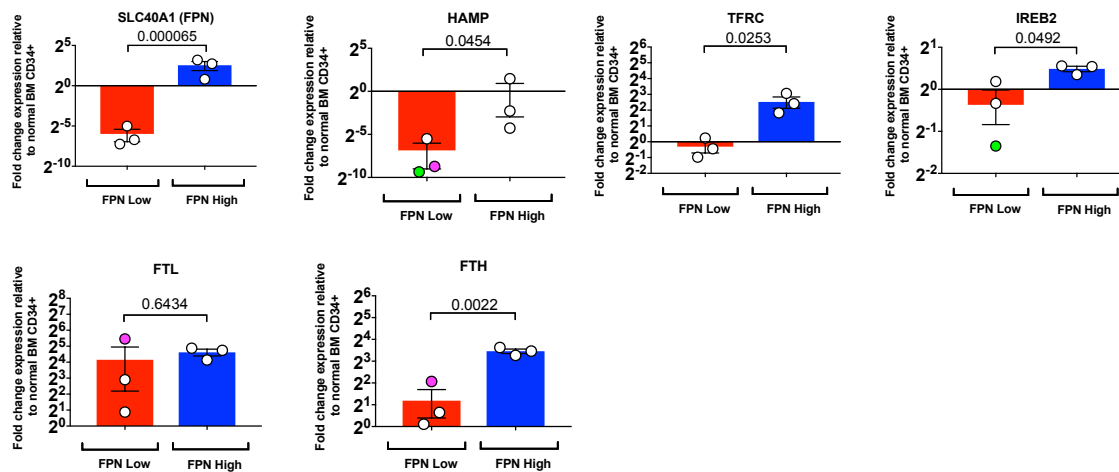

## Antioxidant Genes

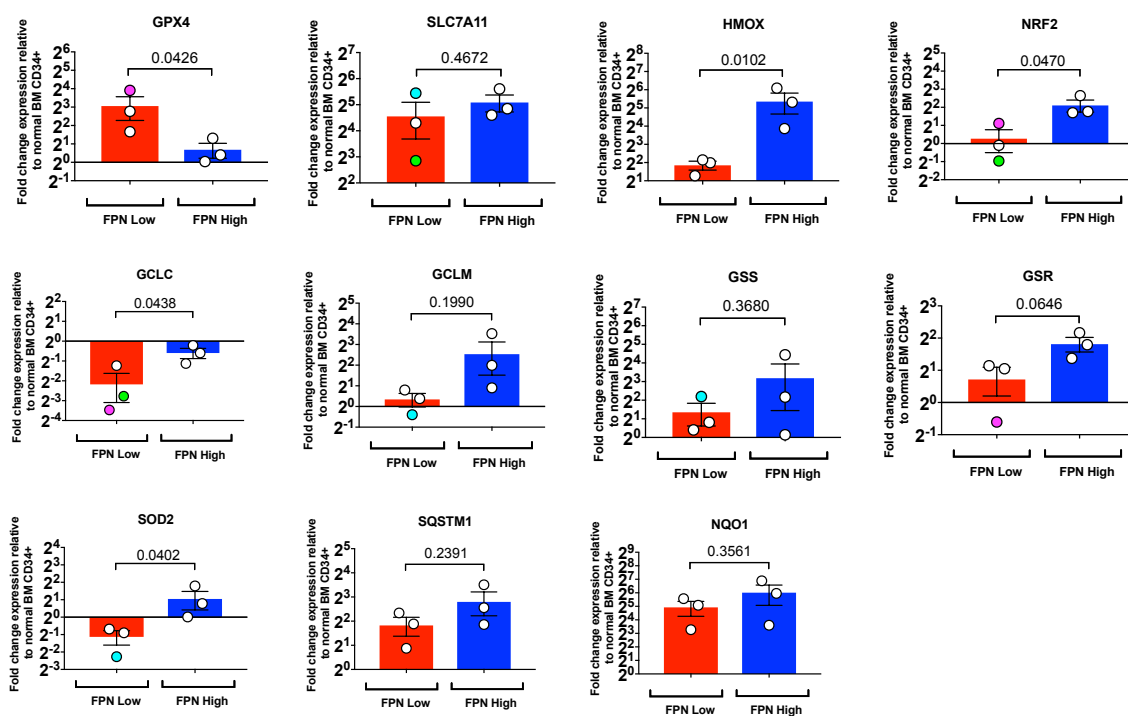

**Supplementary Figure 6.** mRNA expression relative of nBM stratified to FPN-low and FPN-high lines. Overall iron and antioxidant genes for FPN low cell lines are expressed at a lower level than FPN high cell lines. One clear exception for untreated FPN low cell lines is GPX4 mRNA expression showing a nearly 16-fold increase in activity relative to nBM and 4-8-fold higher than FPN high lines. Green = KCL22, magenta = MV411, teal = UKE1, brown = SET2, grey = TF-1, navy blue = HEL. N=3 cell lines per category (high or low SLC40A1), n=3 replicates per mRNA measurement, n=6 FPN low and high cell lines tested (n=3 per group), centre value = mean of cell lines, error bars = SEM on cell lines

low or high in SLC40A1. Statistics for each gene were determined using a two-tailed unpaired t-test between FPN low and high groups.

# Iron Genes

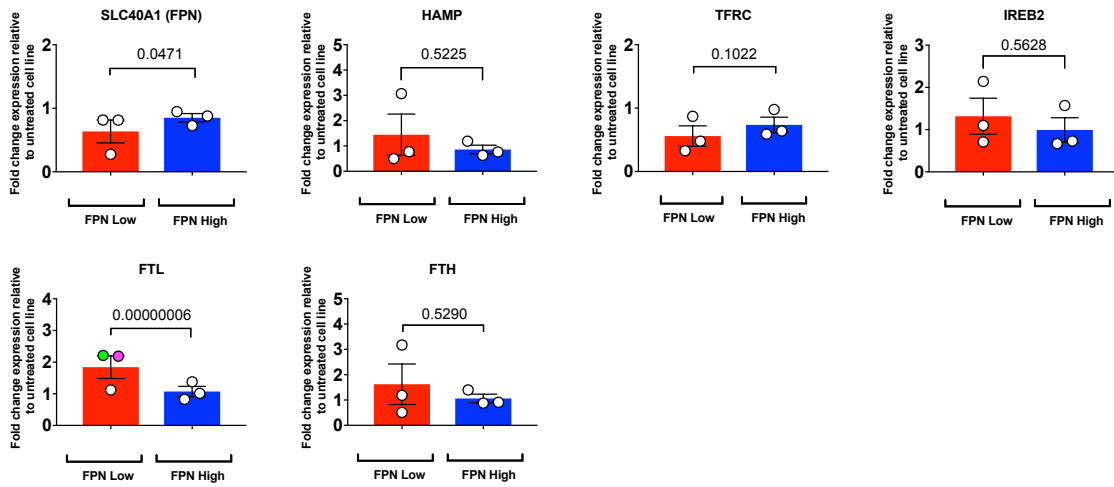

# Antioxidant Genes

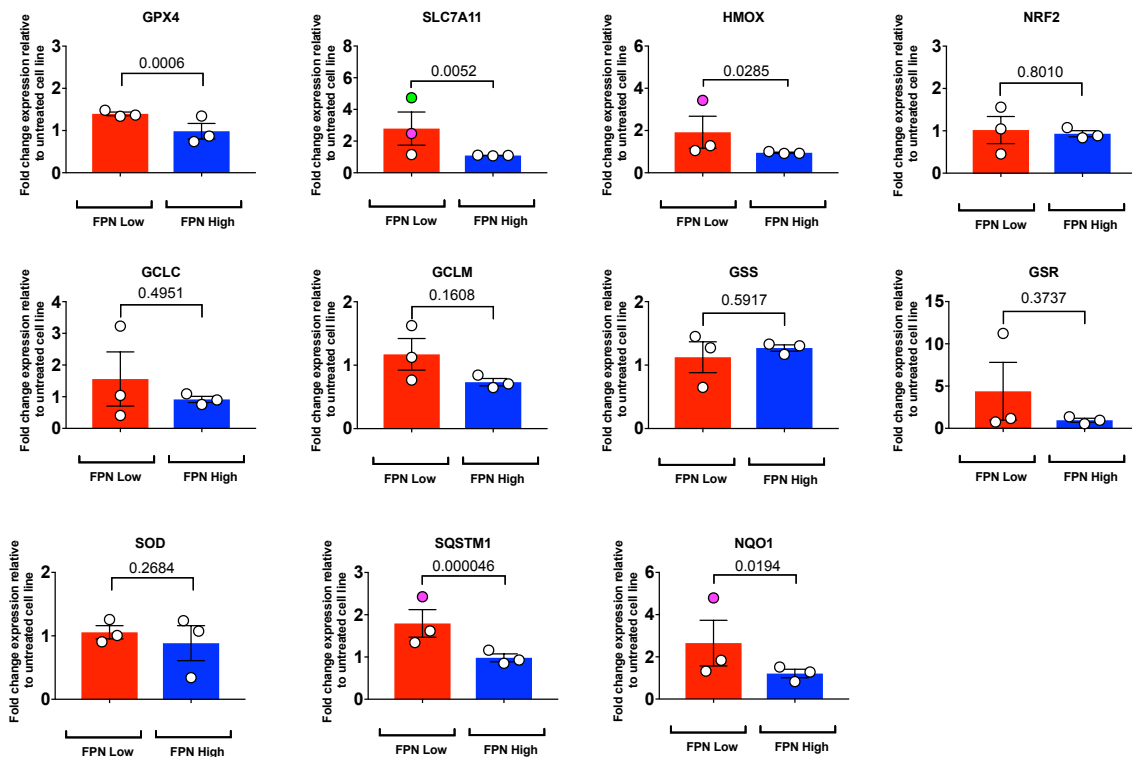

# Inflammation

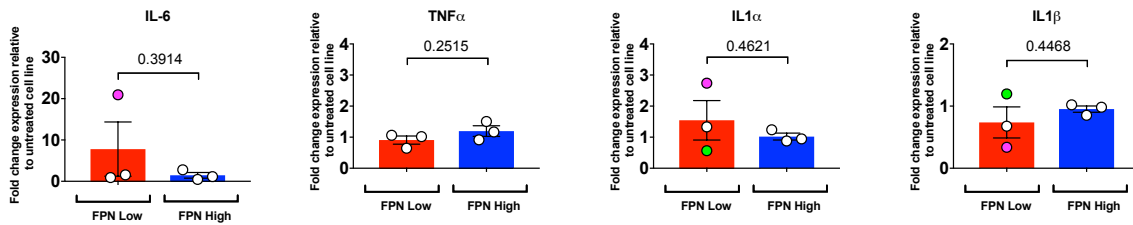

**Supplementary Figure 7.** Quantitative RT-PCR mRNA expression of iron, antioxidant and inflammation genes relative to untreated at 24 hours. Increases in HMOX1, SLC7A11 and FTL are the main significant changes in gene expression between ferumoxytol treated FPN low and high cell lines. Green = KCL22, magenta = MV411, teal = UKE1, brown = SET2, grey = TF-1, navy blue = HEL. N=3 cell lines per FPN low or high group, n=3 technical replicates per cell line, centre value = mean, error bars = SEM on cell lines low or high in SLC40A1. All statistics reported used two-tailed unpaired t-test.

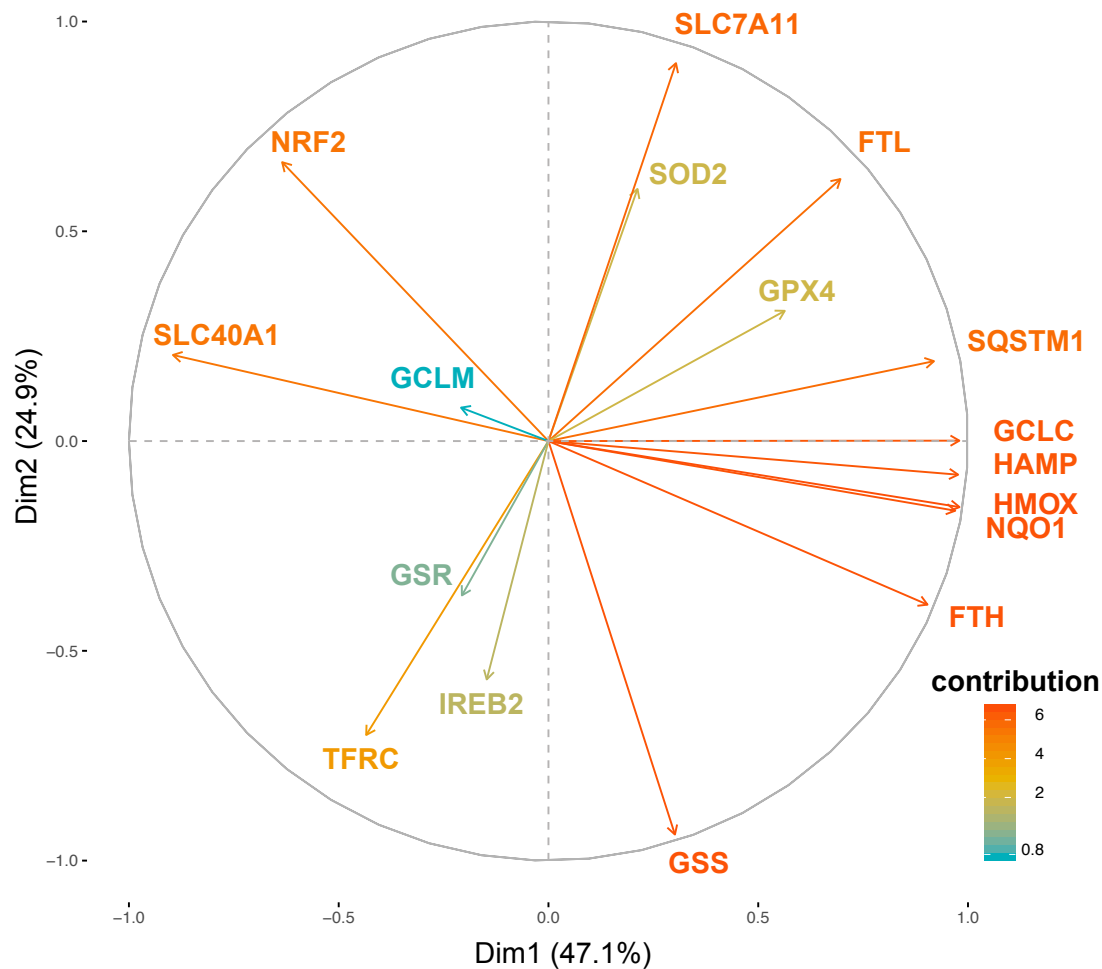

**Supplementary Figure 8.** Principle Component Analysis (PCA) of quantitative RT-PCR genes changes upon ferumoxytol administration relative to untreated. Largest gene cluster contains SQSTM1, GCLC, HAMP, HMOX, and NQO1 and opposes SLC40A1 (FPN) expression, meaning lower SLC40A1 expression is typically balanced by higher oxidative stress and antioxidant response genes. n=17 genes included in PCA with n=6 cell lines tested per gene with n=3 FPN low and n=3 FPN high. PCA dataset is **Supplementary Fig. 7** and values were repeated independently twice by RT-PCR before triplicate measurements were used to represent a single cell line for a specific gene. R-code was repeated four times to confirm matrix transformation and component analysis was done consistently.

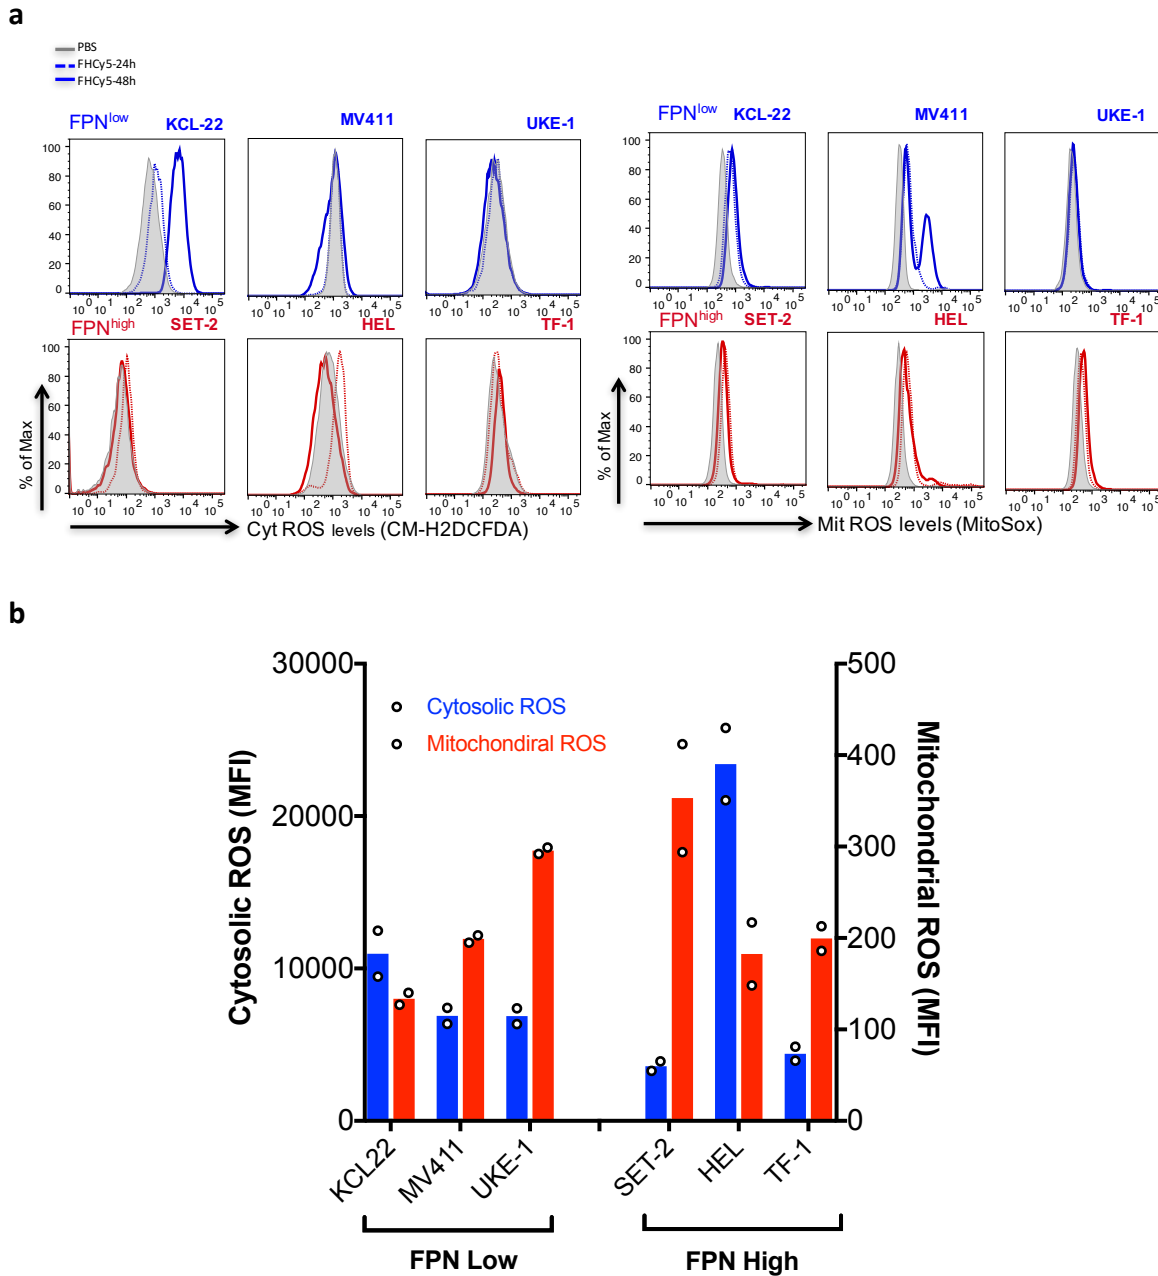

**Supplementary Figure 9.** Cellular and mitochondrial ROS in leukemic cell lines. A) **Fig. 1i** redrawn (n=6 cell lines n=2 technical replicates per cell line) as representative histogram from original ROS FACS scatter plot of Cy5-ferumoxytol treated AML cell lines 24 and 48 hours later showing ROS increases in FPN low (top row) lines. FPN high (bottom row) appears unchanged with ferumoxytol administration in regard to cytosolic and mitochondrial ROS production by 48 hours. B) Basal ROS levels between FPN low and high lines for cytosolic or mitochondrial ROS, n=2 technical replicates.



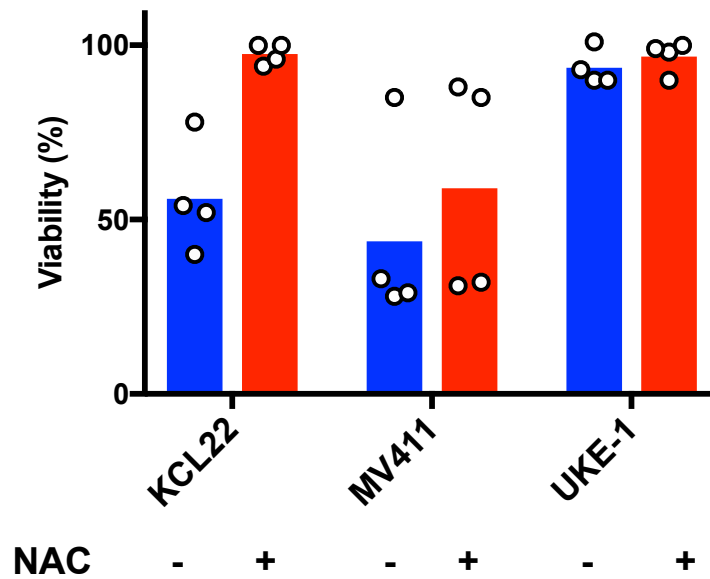

**Supplementary Figure 10.** Pre-treatment of FPN low expressing cell lines with N-Acetyl Cysteine (NAC) can partially protect cells from death after ferumoxytol administration. KCL22 and MV411 cell lines most sensitive to ferumoxytol administration see a full and partial protection respectively by administration of NAC. Partial protection of MV411 suggests strong ROS induction (**Supplementary Fig. 9a**) may be greater than glutathione capacity even with a supply of NAC. n=4 technical replicates per FPN low cell line, centre value = mean.

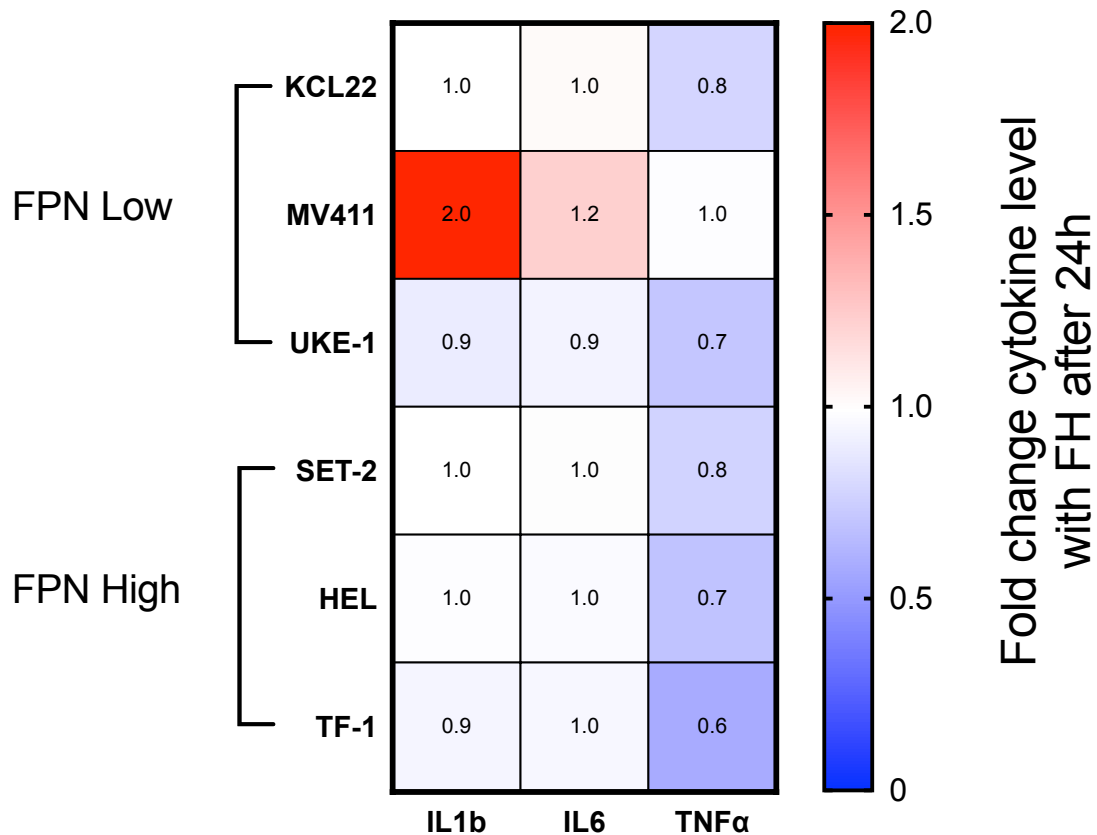

**Supplementary Figure 11.** Cytokine panel of AML cell lines shows no significant increase in measured cytokines upon 24h ferumoxytol (FH) exposure. Majority of measured cytokines were below the limit of detection. Heatmap normalized ferumoxytol treated to untreated lines shows no clear elevation in secreted cytokines for either FPN low or FPN high groups. N=6 biological replicates per cell line, n=8 technical replicates (IL6 TNF $\alpha$ ), n=5 technical replicates for IL1b per cell line, value = mean fold change to untreated.

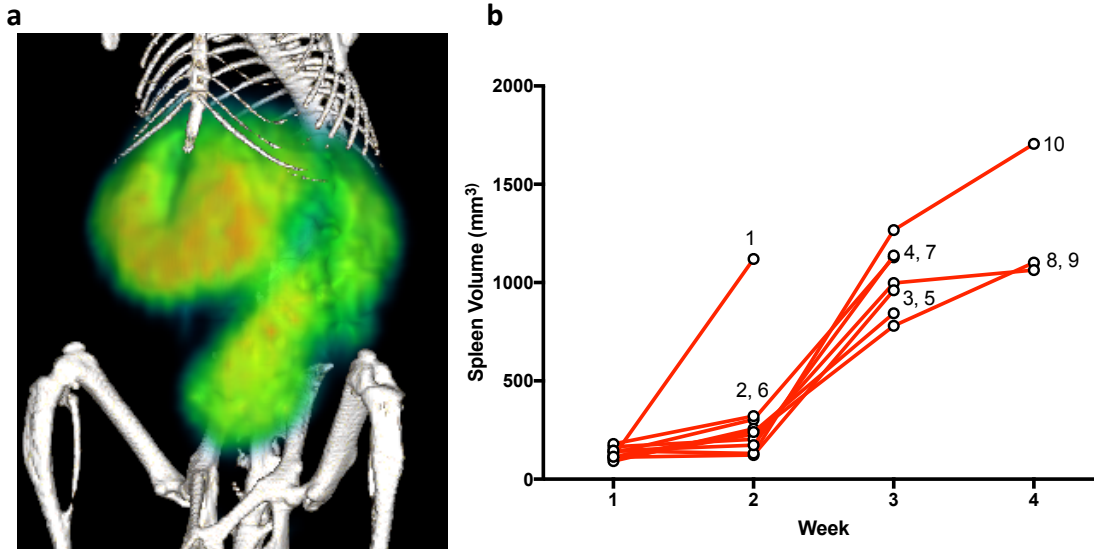

**Supplementary Figure 12.**  $^{89}\text{Zr}$ -ferumoxytol PET imaging of spleen size as a function of time. A) Representative image of a mouse liver and spleen displaying splenomegaly at week 3 using  $^{89}\text{Zr}$ -ferumoxytol 24 hours post injection. B) Spleen volumes as determined by PET region of interest shows marked spleen enlargement between 2-3 weeks. Numbers indicate order of death within cohort on Kaplan-Meier curve (**Supplementary Fig. 13**). n=10 mice per treatment group once confirmed for bcCML engraftment.

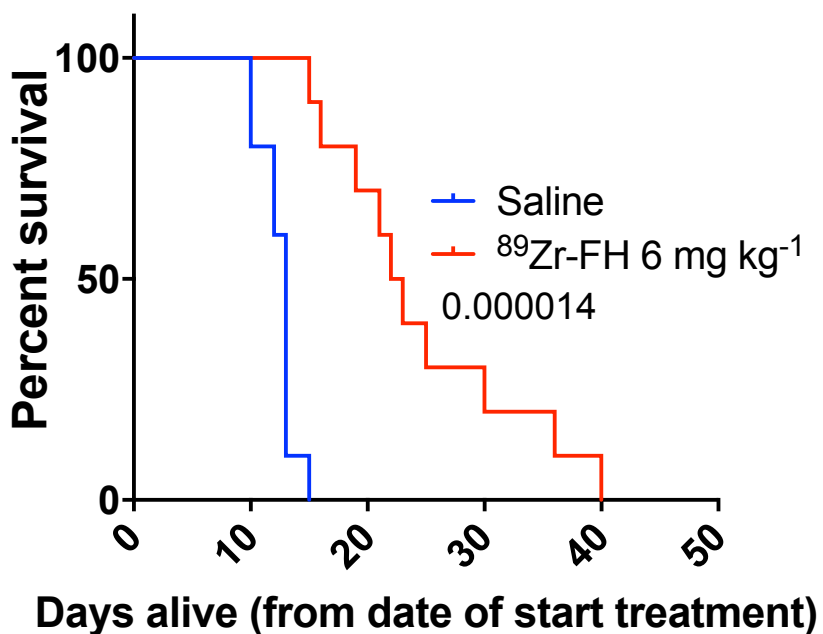

**Supplementary Figure 13.** Kaplan-Meier curve showing <sup>89</sup>Zr-ferumoxytol (<sup>89</sup>Zr-FH) had a similar and significant survivability outcome similar to **Fig. 2i** with mice administered 6 mg kg<sup>-1</sup>. Median survivability 13 days for saline, and 22.5 days for 6 mg kg<sup>-1</sup> <sup>89</sup>Zr-ferumoxytol. n=10 mice per treatment group, survival curve significance determined by log-rank Mantel-Cox test.

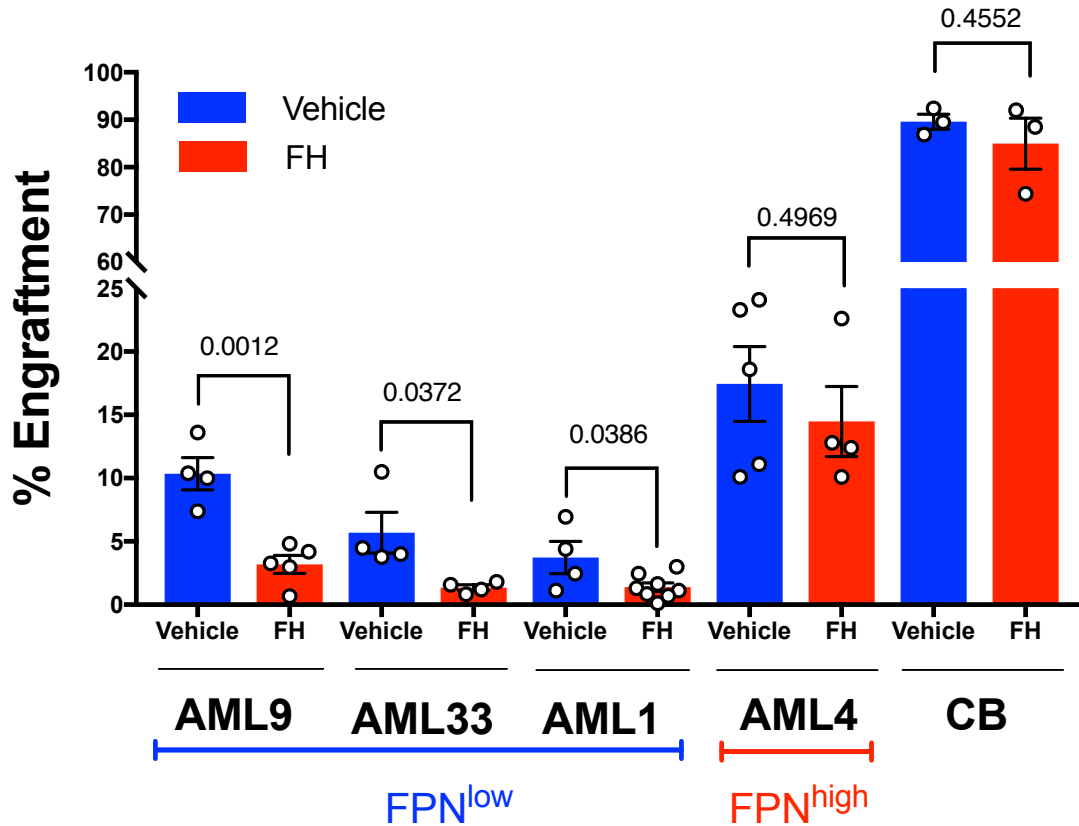

**Supplementary Figure 14.** Engraftment percentages for AML patient derived xenografts (AML-PDX) and CD34<sup>+</sup> core blood. Patient derived xenografts from FPN low patients have statistically lower engraftment percentages when treated with ferumoxytol (FH). No statistical significance is seen in ferumoxytol treated FPN-high PDX sample as well as normal core blood. n=3 mice for core blood samples (Vehicle or ferumoxytol), n=4 mice for AML 9, AML 33 and AML1, n=4 for AML4 vehicle and n=8 for AML4 ferumoxytol with patient derived xenografts (vehicle or control), centre value = mean, error bars = SEM. A two-tailed unpaired t-test was used for comparison of each group between vehicle and ferumoxytol treated.

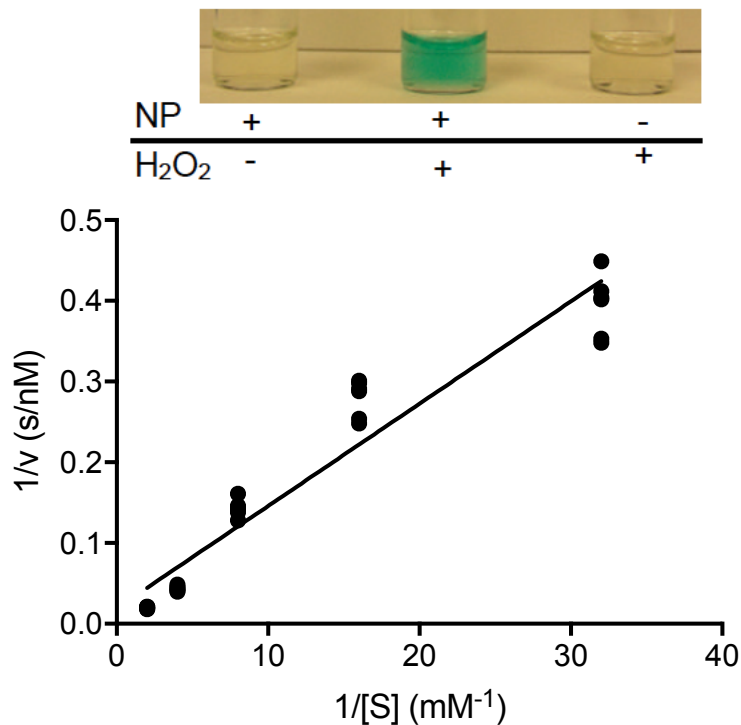

**Supplementary Figure 15.** Ferumoxytol has peroxidase-like activity, capable of catalyzing the conversion of organic substrates, including reporter molecules such as TMB (3,3',5,5'-Tetramethylbenzidine), in the presence of hydrogen peroxide through a Fenton-reaction-based mechanism. An increase of intracellular ROS, such as hydrogen peroxide and hydroxyl radicals as a substrate, would drive a faster rate of peroxidase activity. Peroxidase activity rates were in a manner consistent of an enzymatic or catalytic process as seen with the increase in reaction velocity with peroxide addition (n=6 technical replicates).

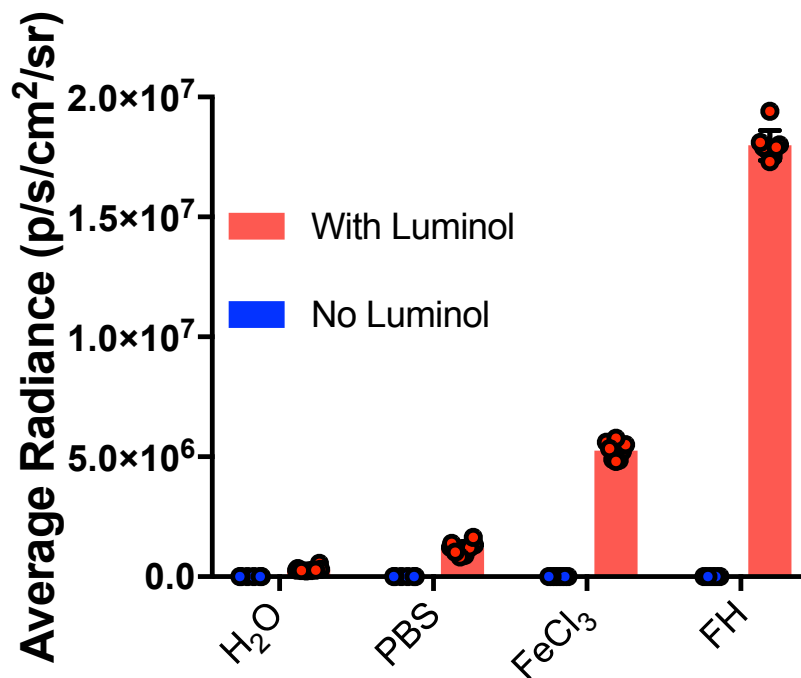

**Supplementary Figure 16.** Radiance measurements from luminol addition to iron sources at 1000 $\mu$ g Fe (n=8 technical replicates) show ferumoxytol (FH) to produce nearly 4 times the ROS as FeCl<sub>3</sub> after 30 minutes.

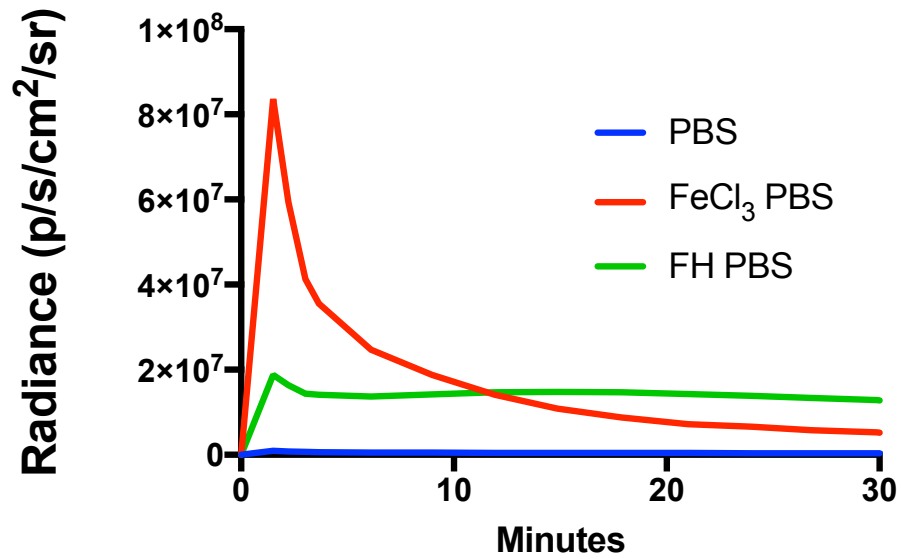

**Supplementary Figure 17.** Radiance measurements from the same luminol assay in **Supplementary Fig. 16** between 0-30 minutes shows a high initial ROS production followed by an exponential decrease in ROS generation with free FeCl<sub>3</sub> while ferumoxytol administration produces a nearly consistent production overtime that exceeds free FeCl<sub>3</sub> after 12 minutes. Data line plots are shown as mean, N=8 technical replicates per group.
